# Supplementary material for: In vivo tissue pharmacokinetics of ERBB2‐specific binding oligonucleotide‐based drugs by PET imaging
Source: PubMed Central journal article supplement — Clin Transl Sci. 2023 Apr 20;16(7):1186–96. doi: 10.1111/cts.13522 (PMC10339696; doi:10.1111/cts.13522), 2023-04-20
Supplement: CTS-16-1186-s001.pdf [file CTS-16-1186-s001.pdf]

# Supplementary Materials

## In vivo tissue pharmacokinetics of ERBB2-specific binding oligonucleotide based drugs by PET imaging

Sun Mi Park<sup>1,†</sup>, Suji Baek<sup>2,†</sup>, Jung Hwan Lee<sup>3</sup>, Sang-Keun Woo<sup>4</sup>, Tae Sup Lee<sup>4</sup>, Hyun Soo Park<sup>5</sup>, Jongook Lee<sup>3</sup>, Yeon-Koo Kang<sup>1</sup>, Seo Young Kang<sup>1</sup>, Min Young Yoo<sup>1</sup>, Hai-Jeon Yoon<sup>1</sup>, Bom Sahn Kim<sup>1,\*</sup>, Kang Pa Lee<sup>2,\*</sup>, Byung Seok Moon<sup>1,\*</sup>

<sup>1</sup>Department of Nuclear Medicine, Ewha Womans University College of Medicine, Seoul 07804, Korea

<sup>2</sup>Research and Development Center, UMUST R&D Corporation, Seoul 01411, Korea

<sup>3</sup>Research and Development Center, INTEROligo Corporation, Anyang, 14058, Korea

<sup>4</sup>Division of RI Applications, Korea Institute Radiological and Medical Sciences, Seoul 01812, Korea

<sup>5</sup>Graduate School of Convergence Science and Technology, Seoul National University, Seoul 08826, Korea

†These authors contributed equally to this study.

### Radiosynthesis of ERBB2-cODN-idT-APs-<sup>[18F]</sup>F (<sup>[18F]</sup>1)

**Figure S1.** Radio-TLC chromatogram for fluorine-18 incorporation of N<sub>3</sub>-PEG<sub>3</sub>-<sup>[18F]</sup>F (<sup>[18F]</sup>3).

**Figure S2.** Radio-TLC chromatogram of the N<sub>3</sub>-PEG<sub>3</sub>-<sup>[18F]</sup>F mixture obtained after pretreatment with a C18 plus Sep-Pak cartridge.

**Figure S3.** Preparative HPLC chromatogram of the reaction mixture, <sup>[18F]</sup>3 (red: gamma ray; blue: UV-220 nm).

**Figure S4.** Analytical HPLC chromatogram for determining the radiochemical purity of <sup>[18F]</sup>3 (upper: gamma ray, bottom: UV-220 nm).

**Figure S5.** Radio-TLC chromatogram for determining the conversion yield from <sup>[18F]</sup>3 to <sup>[18F]</sup>5.

**Figure S6.** Radio-TLC chromatogram obtained after pretreatment of <sup>[18F]</sup>5 with a C18 Sep-Pak cartridge.

**Figure S7.** Preparative HPLC chromatogram of the reaction mixture, <sup>[18F]</sup>5 (red: gamma ray; blue: UV-260 nm).

**Figure S8.** Analytical HPLC chromatogram obtained to determine the radiochemical purity of <sup>[18F]</sup>5 (upper: gamma ray; bottom: UV-260 nm).

**Figure S9.** Co-injection HPLC chromatogram with standard 5 for determining the identity of <sup>[18F]</sup>5 (upper: gamma ray; bottom: UV-260 nm).

**Figure S10.** Analytical HPLC chromatogram obtained for determining the hybridization efficiency of

[<sup>18</sup>F]**1** (upper: gamma ray; bottom: UV-260 nm).

**Figure S11.** Co-injection HPLC chromatogram with standard **1** for determining the identity of [<sup>18</sup>F]**1** (upper: gamma ray; bottom: UV-260 nm).

**Figure S12.** Time-activity curves of ERBB2-cODN-idT-APs-[<sup>18</sup>F]**1** ([<sup>18</sup>F]**1**) for internal dosimetry calculated from whole-body PET images.

**Figure S13.** The ratio of AUCs for various organs to the blood over a late time-interval (70-90 min).

**Figure S14.** Investigation of changes for optimal hybridization efficiency at various concentrations (1, 2, 3, 5, 10, 50, 100 and 200 nmol) of ERBB2-cODN-idT-AP (**6**) (gamma ray).

**Table S1.** Pharmacokinetic parameters of [<sup>18</sup>F]**1** after intravenous administration in healthy mice

**Table S2.** Pharmacokinetic parameters of [<sup>18</sup>F]**1** after intravenous administration in ERBB2-positive tumor (KPL4)-bearing mice

**Table S3.** Internal absorbed dose in normal mice (mGy/MBq)

### **Radiosynthesis of ERBB2-cODN-idT-APs-<sup>[18F]</sup>F (<sup>[18F]</sup>1)**

Fluorine-18 in O-18 water from the cyclotron was extracted on a pre-activated QMA carbonate Sep-Pak cartridge using a solution of tetra-n-butylammonium bicarbonate (TBAHCO<sub>3</sub>, 40 wt%, 5.0 μL) in MeOH (1 mL). The eluted solution containing fluorine-18 was dried azeotropically at 100 °C under a nitrogen stream; this process was repeated with the subsequent addition of acetonitrile (CH<sub>3</sub>CN, 0.4 mL) at 100 °C (× 2). The precursor, 11-azido-3,6,9-trioxa-1-undecanol mesylate (**2**, N<sub>3</sub>-PEG<sub>3</sub>-OMs, 2.5 μL) was dissolved in acetonitrile (0.5 mL) and added in a reaction vial (4 mL size) which contained the TBA<sup>+</sup>[<sup>18</sup>F]F<sup>-</sup> complex. The reaction mixture was then stirred at 100 °C for 10 min. After cooling to room temperature, the labeling yield was checked by radio-thin layer chromatography (TLC) (100% EtOAc, R<sub>f</sub> = 0.7~0.8, Figure S1). The reaction solution was diluted with 15 mL of water, loaded on a C18 plus Sep-Pak cartridge, washed with 5 mL of water, and eluted with 1.5 mL of acetonitrile. The pretreated product by a C18 plus Sep-Pak cartridge, N<sub>3</sub>-PEG<sub>3</sub>-<sup>[18F]</sup>F (<sup>[18F]</sup>3), was found to be over 99% of radiochemical purity (Figure S2). The eluted acetonitrile solution was diluted with 4 mL of water, filtered using a syringe filter (GHP, 13 mm, 0.45 μm), and purified using a reverse-phase HPLC system A [Gilson 321 System equipped with a UV detector (UV-220 nm) and gamma-ray detector (Lablogic systems, Sheffield, UK); column: XBridge RP18 (Waters, 10 × 250 mm) with a guard column (Phenomenex, CA, USA; 10 × 10 mm); eluent: 20% CH<sub>3</sub>CN:H<sub>2</sub>O; flow rate: 3 mL/min; Figure S3]. The eluate was collected at a retention time of approximately 26 min and diluted with 40 mL of water, slowly trapped on a C18 plus Sep-Pak cartridge, washed with 5 mL of water, and eluted with 1.0 mL of acetonitrile. The eluted solution was used for the subsequent click reactions without further treatment. In this step, the radiochemical purity was above 99%, as checked by an analytical HPLC system B [Agilent 1260 system equipped with a UV detector (UV-220 nm) and gamma-ray detector (Elysia-Raytest, Straubenhardt, Germany); column: Xterra RP18 (Waters, 4.6 × 250 mm); flow rate: 1 mL/min; eluent: 10% CH<sub>3</sub>CN:0.1 M triethylamine acetate (TEAA, 0 min); 10% CH<sub>3</sub>CN:0.1 M TEAA (5 min); 80% CH<sub>3</sub>CN:0.1 M TEAA (15 min); Figure S4].

For the synthesis of cODN-PEG<sub>3</sub>-<sup>[18F]</sup>F (<sup>[18F]</sup>5), 0.1 M CuI in acetonitrile (20 μL), 1 M DIPEA in acetonitrile (10 μL), and N<sub>3</sub>-PEG<sub>3</sub>-<sup>[18F]</sup>F in CH<sub>3</sub>CN (<sup>[18F]</sup>3, 0.7 mL) were added in a 4 mL vial in order; finally 3'-GTC GGT GTG GTG GTC-5'-hexynyl (**4**, cODN-5'-hexynyl) in water (200 μg in 0.2 mL) was added to the vial. The mixture was then stirred at 70 °C for 20 min. After cooling to room temperature, the conversion yield was checked by radio-TLC (100% EtOAc, R<sub>f</sub> = 0.0~0.1 for cODN-PEG<sub>3</sub>-<sup>[18F]</sup>F and R<sub>f</sub> = 0.7~0.8 for N<sub>3</sub>-(PEG)<sub>3</sub>-<sup>[18F]</sup>F; Figure S5). The mixture was diluted with 10 mL of 0.05 M TEAA which contained 10 μL of 0.5 M ethylenediaminetetraacetic acid (EDTA), loaded on a C18 plus Sep-Pak cartridge, washed with 10 mL of water, and then eluted with 1 mL of acetonitrile (Figure S6). In this step, most of the N<sub>3</sub>-PEG<sub>3</sub>-<sup>[18F]</sup>F (<sup>[18F]</sup>3) was removed. The eluted solution was diluted with 4 mL of 0.1 M TEAA, filtered using a syringe filter (GHP, 13 mm, 0.45 μm), and purified using a reverse-phase HPLC System C [Gilson 321 System equipped with a UV detector (UV-260 nm)

and gamma-ray detector (Lablogic systems, UK); column: XBridge RP18 (10 × 250 mm) with a guard column (Phenomenex, CA, USA; 10 × 10 mm); eluent: 5% CH<sub>3</sub>CN:0.1 M TEAA (0 min); 5% CH<sub>3</sub>CN:0.1 M TEAA (5 min); 30% CH<sub>3</sub>CN:0.1 M TEAA (25 min); 80% CH<sub>3</sub>CN:0.1 M TEAA (30 min); flow rate: 3 mL/min; Figure S7]. The eluate was collected at a retention time of approximately 22 min, diluted with 10 mL of water, slowly trapped on a C18 plus Sep-Pak cartridge, washed with 10 mL of water, and eluted with 1.0 mL of ethanol. The collected solution was completely evaporated under a nitrogen stream at 95 °C. In this step, the radiochemical purity (over 99%, Figure S8) and identity (Figure S9) were checked using an analytical HPLC system D [Agilent 1260 system equipped with a UV detector (UV-260 nm) and gamma-ray detector (Elysia-Raytest, Germany); column: Xterra RP18 (Waters, 4.6 × 250 mm); flow rate: 1 mL/min; eluent: 10% CH<sub>3</sub>CN:0.1 M TEAA (0 min); 10% CH<sub>3</sub>CN:0.1 M TEAA (5 min); 80% CH<sub>3</sub>CN:0.1 M TEAA (15 min)].

To prepare the hybridized aptamers, the prepared cODN-PEG<sub>3</sub>-[<sup>18</sup>F]F ([<sup>18</sup>F]**5**) was dissolved in annealing buffer (0.2 mL; 10 mM Tris pH 7.5, 1 mM EDTA, 50 mM NaCl, 10 mM MgCl<sub>2</sub>) containing ERBB2-cODN-idT-APs (**6**, 100 nmol). The mixture was heated to 95 °C for 5 min and cooled slowly to 45 °C at a rate of 1 °C/10 sec; the temperature was maintained at 45 °C for 5 min, and then slowly cooled to 25 °C. The hybridization efficiency and radiochemical purity were checked using an analytical HPLC system D (Figure S10). The identity was confirmed by co-injection with standard ERBB2-cODN-idT-APs-F (**1**, Figure S11). The final solution was diluted with 2 mL of saline and used for further PET imaging studies without further purification.

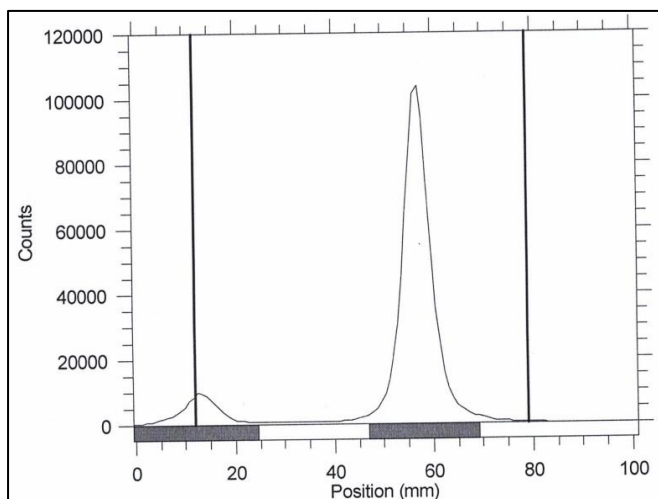

**Figure S1.** Radio-TLC chromatogram for fluorine-18 incorporation of  $N_3$ -PEG $_3$ - $[^{18}F]F$  ( $[^{18}F]3$ ).

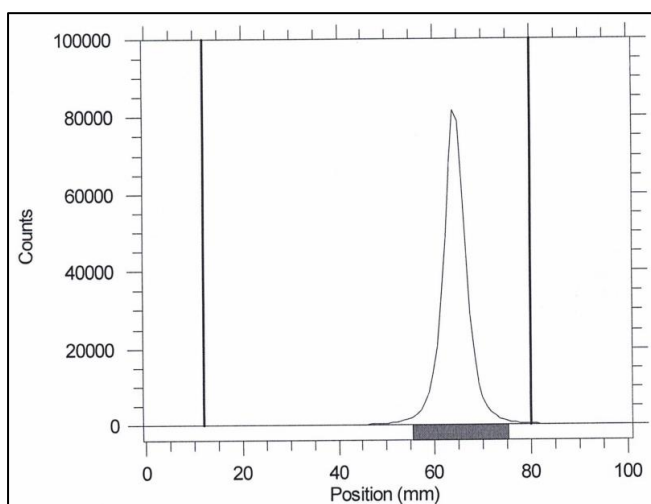

**Figure S2.** Radio-TLC chromatogram of the  $N_3$ -PEG $_3$ - $[^{18}F]F$  mixture obtained after pretreatment with a C18 plus Sep-Pak cartridge.

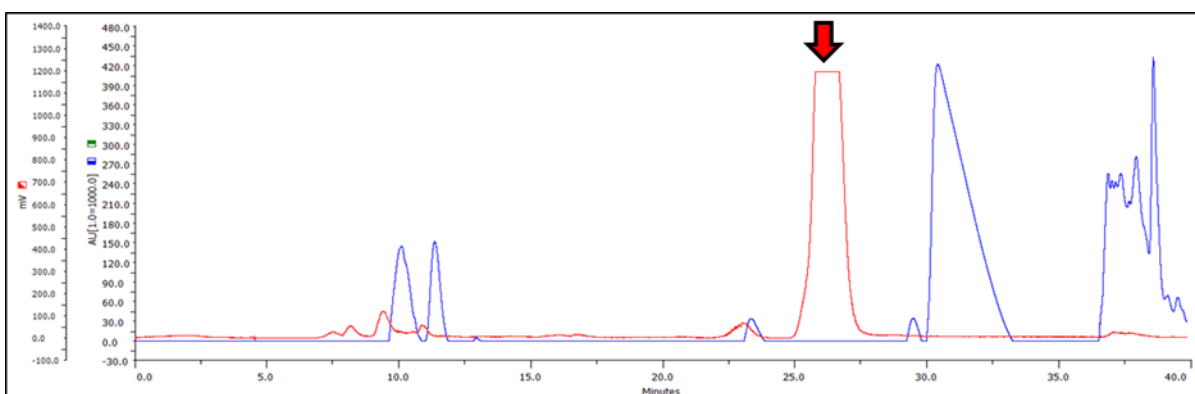

**Figure S3.** Preparative HPLC chromatogram of the reaction mixture,  $[^{18}F]3$  (red: gamma ray; blue: UV-220 nm)

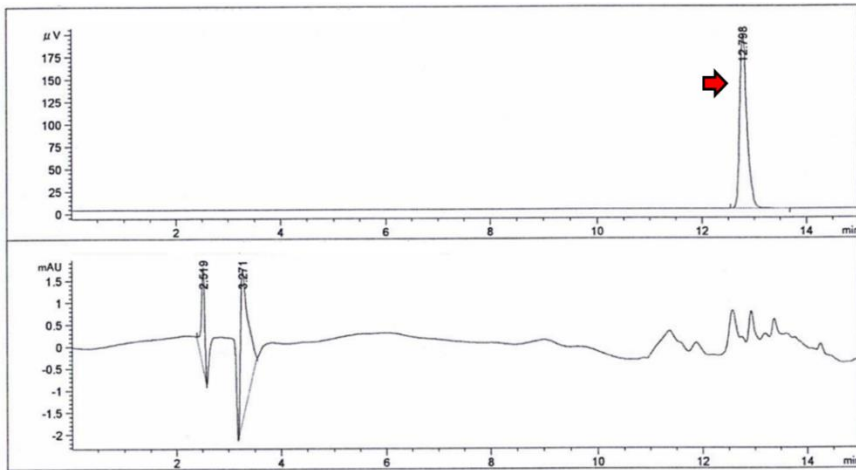

**Figure S4.** Analytical HPLC chromatogram for determining the radiochemical purity of  $[^{18}\text{F}]\mathbf{3}$  (upper: gamma ray, bottom: UV-220 nm).

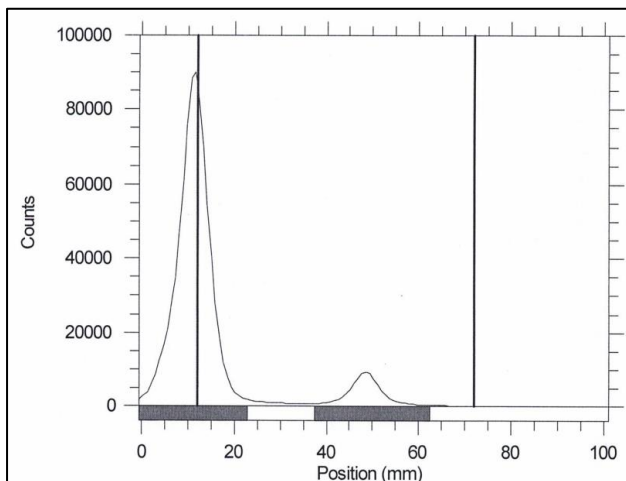

**Figure S5.** Radio-TLC chromatogram for determining the conversion yield from  $[^{18}\text{F}]\mathbf{3}$  to  $[^{18}\text{F}]\mathbf{5}$ .

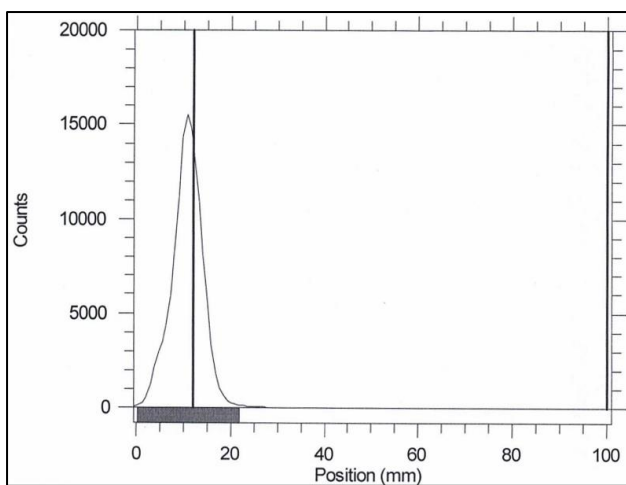

**Figure S6.** Radio-TLC chromatogram obtained after pretreatment of  $[^{18}\text{F}]\mathbf{5}$  with a C18 Sep-Pak cartridge.

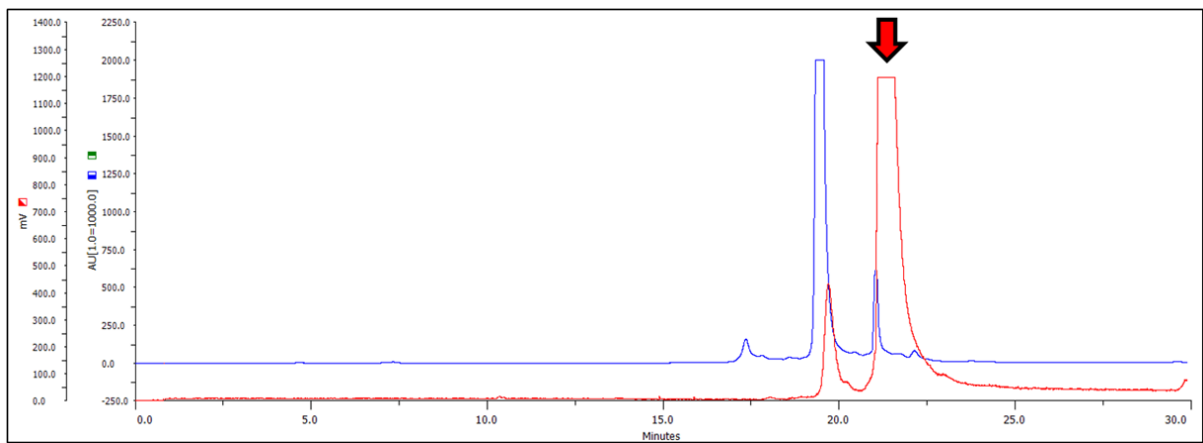

**Figure S7.** Preparative HPLC chromatogram of the reaction mixture, [ $^{18}\text{F}$ ]**5** (red: gamma ray; blue: UV-260 nm).

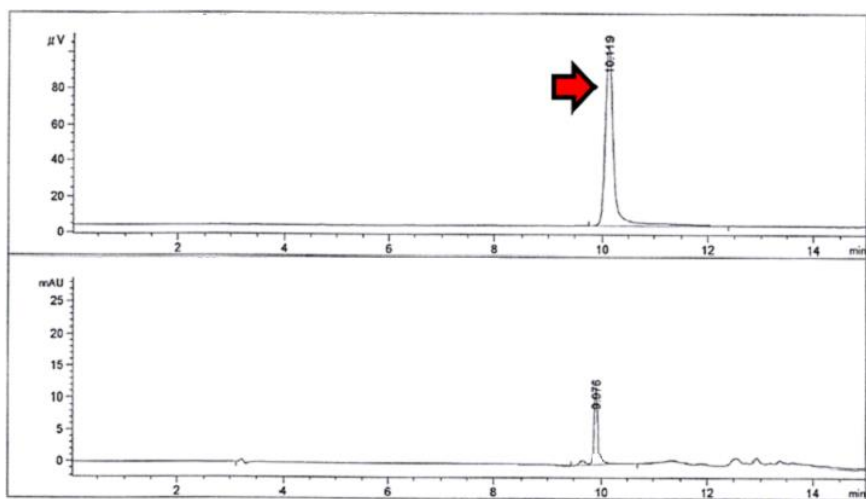

**Figure S8.** Analytical HPLC chromatogram obtained to determine the radiochemical purity of [ $^{18}\text{F}$ ]**5** (upper: gamma ray; bottom: UV-260 nm).

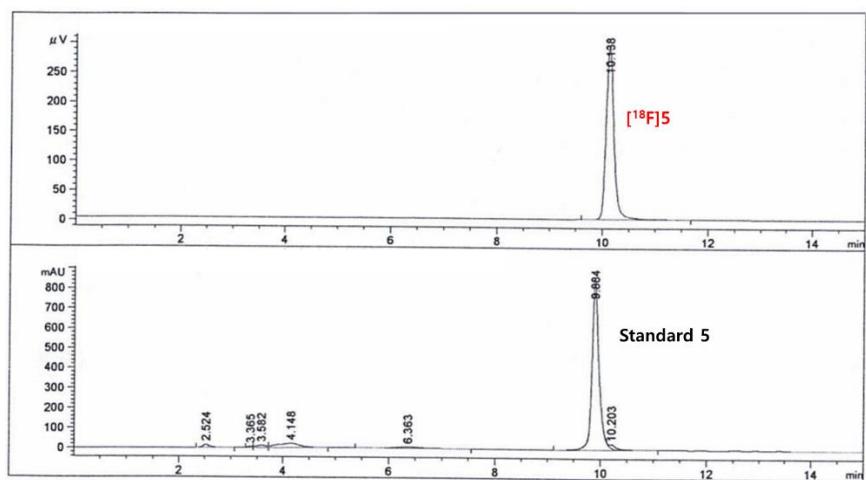

**Figure S9.** Co-injection HPLC chromatogram with standard **5** for determining the identity of [ $^{18}\text{F}$ ]**5** (upper: gamma ray; bottom: UV-260 nm).

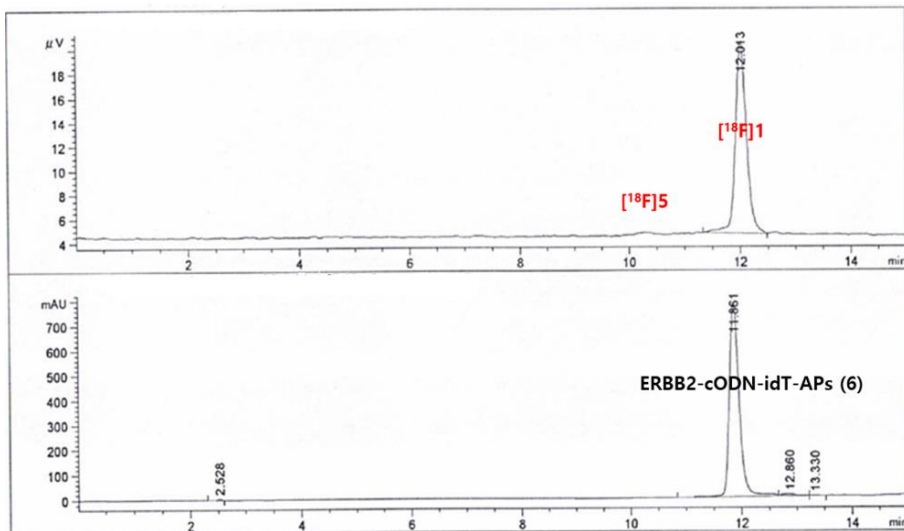

**Figure S10.** Analytical HPLC chromatogram obtained for determining the hybridization efficiency of  $[^{18}\text{F}]1$  (upper: gamma ray; bottom: UV-260 nm).

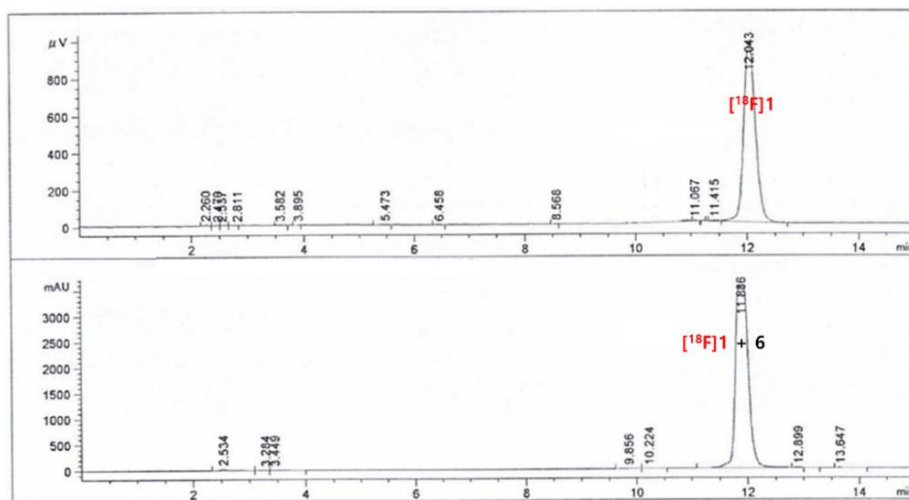

**Figure S11.** Co-injection HPLC chromatogram with standard 1 for determining the identity of  $[^{18}\text{F}]1$  (upper: gamma ray; bottom: UV-260 nm).



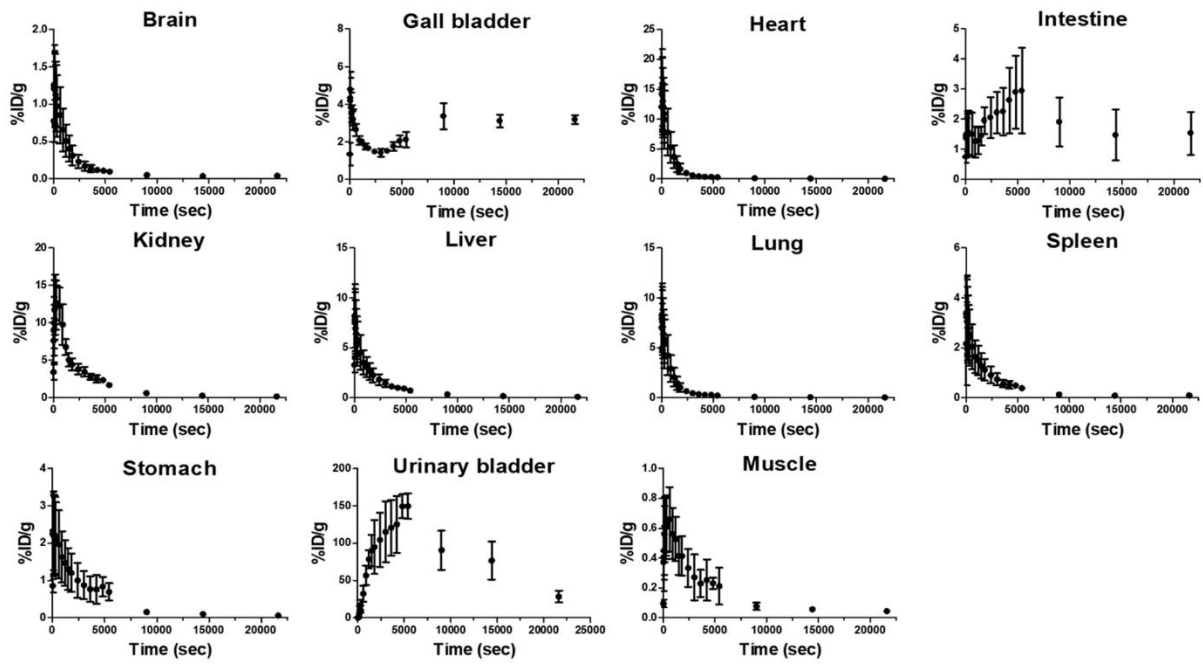

**Figure S12.** Time-activity curves of ERBB2-cODN-idT-APs- $[^{18}\text{F}]\text{F}$  ( $[^{18}\text{F}]\text{1}$ ) for internal dosimetry calculated from whole-body PET images.

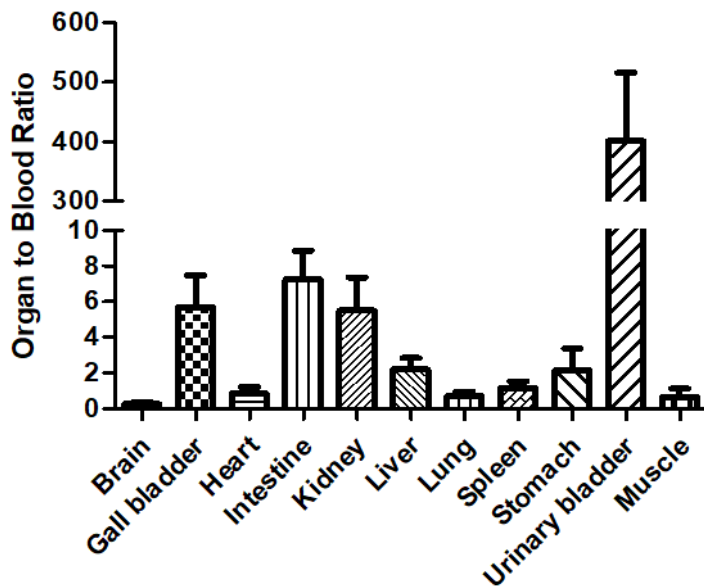

**Figure S13.** The ratio of AUCs for various organs to the blood over a late time-interval (70-90 min).

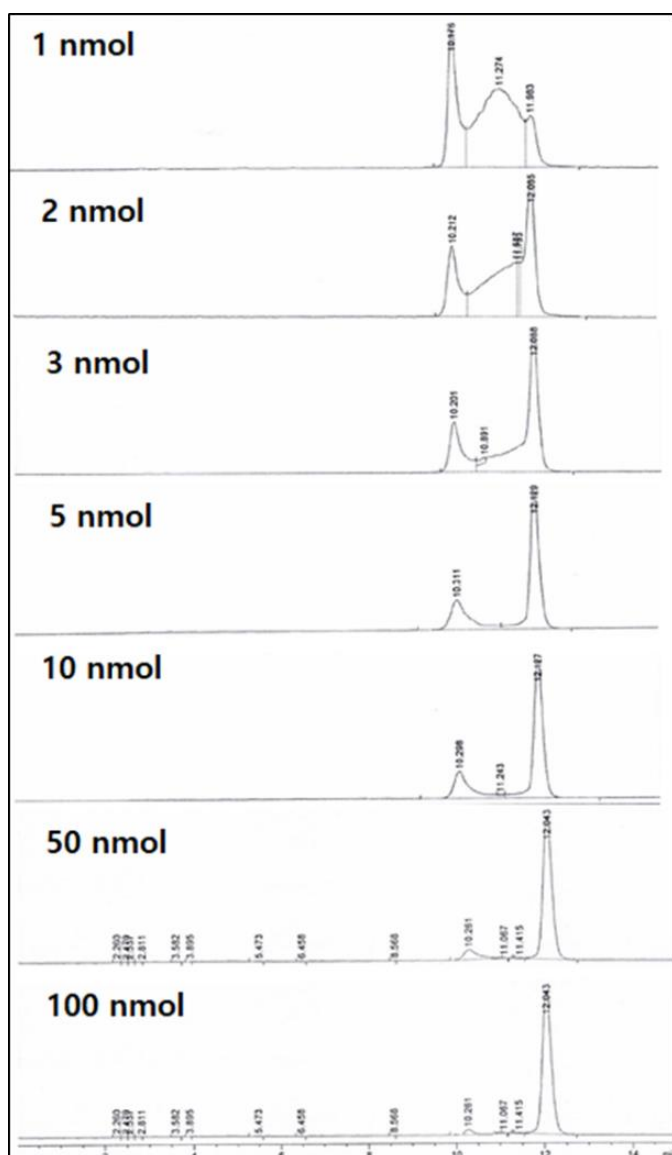

**Figure S14.** Investigation of changes for optimal hybridization efficiency at various concentrations (1, 2, 3, 5, 10, 50, and 100 nmol) of ERBB2-cODN-idT-AP (6) (gamma ray).

**Table S1.** Pharmacokinetic parameters of [<sup>18</sup>F]1 after intravenous administration in healthy mice

| PK parameter    | T <sub>max</sub> (sec)  | C <sub>max</sub> (%ID/g) |     | AUC <sub>0-5,400 sec</sub> (%ID/g·sec) |     | T <sub>1/2</sub> (sec) |     |
|-----------------|-------------------------|--------------------------|-----|----------------------------------------|-----|------------------------|-----|
|                 |                         | mean                     | GSD | mean                                   | GSD | mean                   | GSD |
| Organ           | median (min-max)        |                          |     |                                        |     |                        |     |
| Brain           | 45.0 (45.0-60.0)        | 1.2                      | 1.7 | 1,684.5                                | 1.7 | 734.3                  | 1.3 |
| Gall bladder    | 30.0 (30.0-30.0)        | 4.7                      | 1.2 | 10,420.8                               | 1.1 | 290.4                  | 1.2 |
| Heart           | 30.0 (30.0-30.0)        | 13.9                     | 1.7 | 11,718.7                               | 1.9 | 505.8                  | 1.3 |
| Intestine       | 5,100.0 (240.0-5,400.0) | 3.0                      | 1.4 | 11,090.9                               | 1.3 | -                      | -   |
| Kidney          | 240.0 (120.0-600.0)     | 14.0                     | 1.1 | 26,519.2                               | 1.2 | 666.5                  | 1.3 |
| Liver           | 30.0 (30.0-30.0)        | 7.6                      | 1.7 | 11,333.4                               | 1.4 | 628.1                  | 1.1 |
| Lung            | 30.0 (30.0-45.0)        | 7.7                      | 1.7 | 6,995.2                                | 1.7 | 497.1                  | 1.3 |
| Spleen          | 37.5 (15.0-60.0)        | 3.1                      | 1.9 | 5,280.9                                | 1.6 | 697.2                  | 1.2 |
| Stomach         | 37.5 (30.0-180.0)       | 2.1                      | 1.7 | 5,723.2                                | 1.6 | 1,025.0                | 1.7 |
| Urinary bladder | 5,400.0 (4,800-5,400.0) | 149.2                    | 1.1 | 524,726.6                              | 1.3 | -                      | -   |
| Muscle          | 450.0 (240.0-600.0)     | 0.6                      | 1.4 | 1,863.6                                | 1.4 | 1,019.1                | 1.3 |
| Blood           | 15.0 (15.0-60.0)        | 132.2                    | 1.8 | 37,922.4                               | 1.1 | 146.6                  | 1.7 |

**Table S2.** Pharmacokinetic parameters of [<sup>18</sup>F]1 after intravenous administration in ERBB2-positive tumor (KPL4)-bearing mice.

| PK parameter | T <sub>max</sub> (sec) | C <sub>max</sub> (%ID/g) |      | AUC <sub>0-5,400sec</sub> (%ID/g·sec) |     | T <sub>1/2</sub> (sec) |     |
|--------------|------------------------|--------------------------|------|---------------------------------------|-----|------------------------|-----|
|              |                        | mean                     | GSD  | mean                                  | GSD | mean                   | GSD |
| Organ        | median (min-max)       |                          |      |                                       |     |                        |     |
| Tumor        | 210.0 (120.0-300.0)    | 0.86                     | 1.06 | 3,385.6                               | 1.1 | 3,666.3                | 1.8 |

**Table S3.** Internal absorbed dose in normal mice (mGy/MBq)

| Organs          | Absorbed dose (mGy/MBq) |
|-----------------|-------------------------|
| Brain           | 6.69E00                 |
| Heart           | 2.64E01                 |
| Lung            | 2.95E01                 |
| Liver           | 4.49E00                 |
| Kidney          | 3.73E01                 |
| Stomach         | 6.35E01                 |
| Spleen          | 2.67E01                 |
| Intestine       | 3.17E-01                |
| Urinary bladder | 7.52E-02                |
| Total Body      | 1.83E00                 |
